# Supplementary material
Source: HighWire-hosted journal article supplement (https://tech.snmjournals.org/highwire/filestream/8642/field_highwire_adjunct_files/0/132266_Supplemental_Data.pdf)

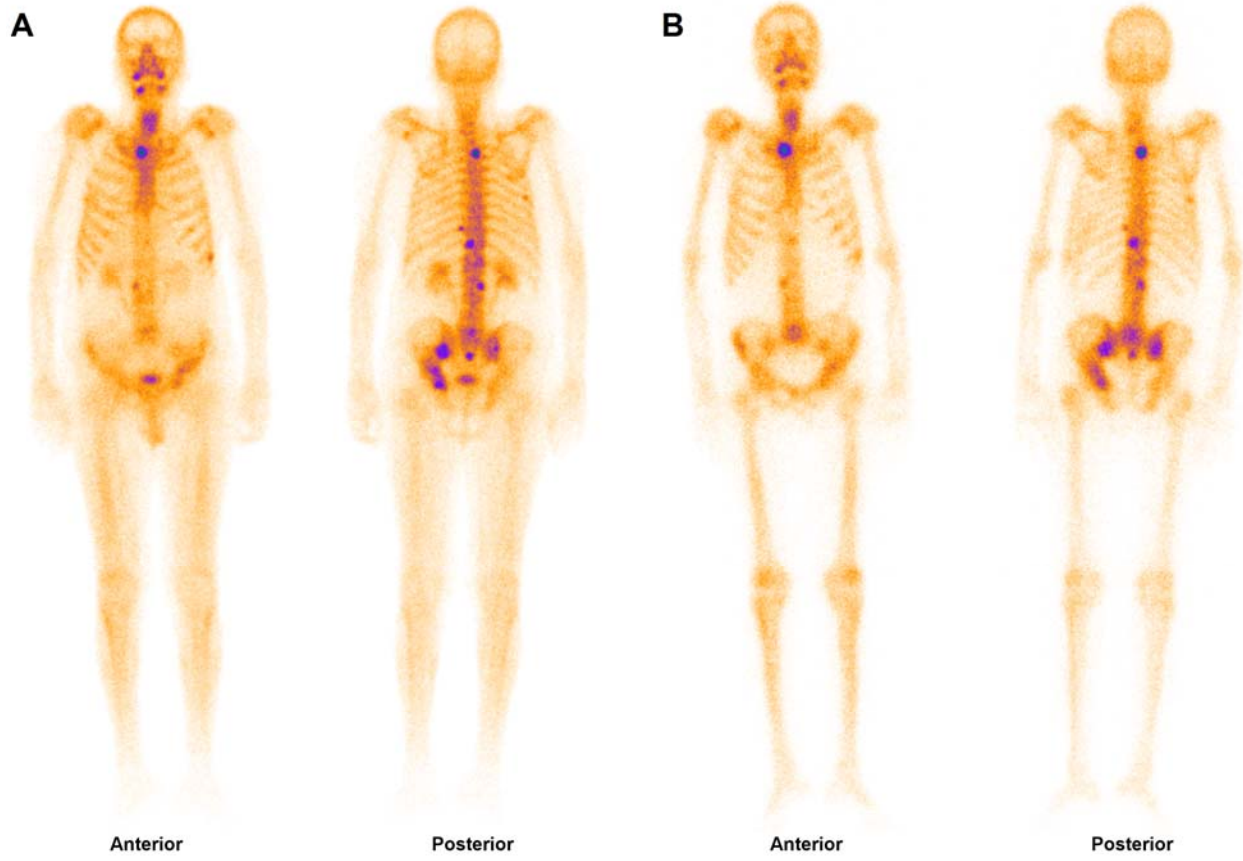

Color version of Figure 5.

Supplement: 132266_Supplemental_Data.pdf [file 132266_Supplemental_Data.pdf]
